# Supplementary material for: Hybridization and differential introgression associated with environmental shifts in a mistletoe species complex
Source: PubMed Central journal article supplement (PMC5882953; doi:10.1038/s41598-018-23707-6), 2018-04-03

Supplementary material on

**Hybridization and differential introgression associated with environmental shifts in a mistletoe species complex**

Fernanda Baena-Díaz<sup>1</sup>, Santiago Ramírez-Barahona<sup>1,2</sup> & Juan Francisco Ornelas<sup>1</sup>

<sup>1</sup>Departamento de Biología Evolutiva, Instituto de Ecología, AC, Carretera antigua a Coatepec No. 351, El Haya, Xalapa, Veracruz 91070, Mexico.

<sup>2</sup>Departamento de Botánica, Instituto de Biología, Universidad Nacional Autónoma de México, Tercer Circuito s/n, Ciudad Universitaria, Coyoacán, Ciudad de Mexico, 04510 Mexico.

Correspondence and requests for materials should be addressed to J.F.O. (email: [francisco.ornelas@inecol.mx](mailto:francisco.ornelas@inecol.mx))

**Table S1.** Geographic location and population codes of the 51 populations from the *Psittacanthus calyculatus / schiedeanus* complex used in the study.

| Location Code | Species Code | Location                               | Region | Habitat | <i>n</i> | Altitude (masl) | Latitude (N) | Longitude (W) |
|---------------|--------------|----------------------------------------|--------|---------|----------|-----------------|--------------|---------------|
| 1             | CALY         | Mexico, Zacatecas, Milpillas           | TMVB   | XTF     | 10       | 1900            | 21° 19' 31'' | 103° 36' 50'' |
| 2             | CALY         | Mexico, Zacatecas, El Remolino         | TMVB   | XTF     | 10       | 1220            | 21° 23' 21'' | 103° 07' 14'' |
| 3             | CALY         | Mexico, Jalisco, Pueblo Nuevo          | TMVB   | XTF     | 11       | 1545            | 20° 15' 30'' | 103° 39' 52'' |
| 4             | CALY         | Mexico, Jalisco, Gómez Farías          | TMVB   | XTF     | 10       | 1360            | 19° 52' 16'' | 103° 31' 47'' |
| 5             | CALY         | Mexico, Jalisco, San José de Gracia    | TMVB   | XTF     | 15       | 2025            | 20° 41' 47'' | 102° 33' 22'' |
| 6             | CALY         | Mexico, Michoacán, La Angostura        | TMVB   | XTF     | 9        | 1540            | 20° 12' 03'' | 102° 26' 35'' |
| 7             | CALY         | Mexico, Guanajuato, El Novillero       | TMVB   | XTF     | 7        | 1710            | 20° 27' 00'' | 101° 31' 58'' |
| 8             | CALY         | Mexico, Querétaro, Querétaro           | TMVB   | XTF     | 10       | 2700            | 20° 35' 00'' | 100° 22' 59'' |
| 9             | CALY         | Mexico, Michoacán, Pátzcuaro           | TMVB   | XTF     | 8        | 2159            | 19° 31' 20'' | 101° 36' 07'' |
| 10            | CALY         | Mexico, Michoacán, Morelia             | TMVB   | XTF     | 3        | 1921            | 19° 39' 00'' | 101° 13' 48'' |
| 11            | CALY         | Mexico, Guanajuato, Acámbaro           | TMVB   | XTF     | 10       | 1884            | 20° 02' 04'' | 100° 39' 45'' |
| 12            | CALY         | Mexico, Michoacán, Maravatío           | TMVB   | XTF     | 11       | 2231            | 19° 54' 06'' | 100° 31' 46'' |
| 13            | CALY         | Mexico, Estado de México, Tenancingo   | TMVB   | XTF     | 7        | 2031            | 18° 59' 28'' | 99° 34' 31''  |
| 14            | CALY         | Mexico, Morelos, Cuernavaca            | TMVB   | XTF     | 5        | 1380            | 18° 59' 06'' | 99° 15' 25''  |
| 15            | CALY         | Mexico, Tlaxcala, Tlaxcala             | TMVB   | XTF     | 16       | 2200            | 19° 17' 00'' | 98° 14' 00''  |
| 16            | CALY         | Mexico, Puebla, Acatepec-Zapotitlán    | OAX    | XTF     | 6        | 1939            | 18° 14' 14'' | 97° 33' 45''  |
| 17            | CALY         | Mexico, Oaxaca, Cacaotepec, La Presa   | OAX    | XTF     | 2        | 1695            | 17° 41' 37'' | 97° 36' 05''  |
| 18            | CALY         | Mexico, Oaxaca, Oaxaca                 | OAX    | XTF     | 6        | 1627            | 17° 04' 47'' | 96° 39' 45''  |
| 19            | CALY         | Mexico, Oaxaca, Teotitlán del Valle    | OAX    | XTF     | 9        | 1680            | 17° 01' 29'' | 96° 31' 39''  |
| 20            | CALY         | Mexico, Oaxaca, San Lorenzo Albarradas | OAX    | XTP     | 11       | 1840            | 16° 52' 58'' | 96° 16' 06''  |
| 21            | CALY         | Mexico, Oaxaca, Sta. María Albarradas  | OAX    | XTF     | 13       | 1780            | 16° 58' 09'' | 96° 11' 31''  |
| 22            | CALY         | Mexico, Oaxaca, Col. Emiliano Zapata   | OAX    | XTF     | 2        | 1484            | 16° 45' 07'' | 96° 50' 42''  |
| 23            | CALY         | Mexico, Oaxaca, San Baltazar Guelavía  | OAX    | XTF     | 1        | 1718            | 16° 47' 34'' | 96° 20' 02''  |
| 24            | CALY         | Mexico, Oaxaca, Sola de Vega           | OAX    | XTF     | 9        | 1430            | 16° 30' 39'' | 96° 58' 57''  |
| 25            | CALY         | Mexico, Oaxaca, Macahuite              | OAX    | TDF     | 2        | 54              | 15° 43' 32'' | 96° 39' 48''  |

|    |      |                                      |      |     |    |      |              |              |
|----|------|--------------------------------------|------|-----|----|------|--------------|--------------|
| 26 | CALY | Mexico, Oaxaca, Santiago Matatlán    | OAX  | XTF | 11 | 1784 | 16° 50' 53'' | 96° 22' 18'' |
| 27 | CALY | Mexico, Oaxaca, Tuxtepec, Ixtlán     | OAX  | XTF | 5  | 1993 | 17° 19' 28'' | 96° 29' 09'' |
| 28 | CALY | Mexico, Oaxaca, Tuxtepec, Puente Xia | OAX  | XTF | 5  | 1513 | 17° 18' 19'' | 96° 31' 35'' |
| 29 | SCHI | Mexico, Oaxaca, Santiago Comaltepec  | OAX  | CF  | 10 | 848  | 17° 41' 23'' | 96° 20' 13'' |
| 30 | SCHI | Mexico, Veracruz, Actópan            | SMOr | TDF | 10 | 322  | 19° 23' 13'' | 96° 36' 56'' |
| 31 | SCHI | Mexico, Veracruz, Cardel, La Mancha  | SMOr | TDF | 6  | 61   | 19° 36' 02'' | 96° 22' 29'' |
| 32 | SCHI | Mexico, Veracruz, Xico               | SMOr | CF  | 12 | 1350 | 19° 24' 37'' | 96° 59' 31'' |
| 33 | SCHI | Mexico, Veracruz, El Riscal          | SMOr | CF  | 11 | 1586 | 19° 28' 47'' | 96° 59' 51'' |
| 34 | SCHI | Mexico, Veracruz, La Pitaya          | SMOr | CF  | 13 | 1343 | 19° 30' 27'' | 96° 57' 39'' |
| 35 | SCHI | Mexico, Veracruz, Clavijero          | SMOr | CF  | 14 | 1225 | 19° 30' 47'' | 96° 56' 28'' |
| 36 | SCHI | Mexico, Veracruz, Rancho Viejo       | SMOr | CF  | 13 | 1350 | 19° 31' 11'' | 96° 58' 22'' |
| 37 | SCHI | Mexico, Veracruz, Coapexpan          | SMOr | CF  | 10 | 1392 | 19° 31' 22'' | 96° 58' 02'' |
| 38 | SCHI | Mexico, Veracruz, Xoloxtla           | SMOr | CF  | 10 | 1454 | 19° 31' 36'' | 97° 00' 34'' |
| 39 | SCHI | Mexico, Veracruz, Las Minas          | SMOr | CF  | 9  | 1828 | 19° 34' 17'' | 96° 59' 21'' |
| 40 | SCHI | Mexico, Veracruz, Tlalnahuayocan     | SMOr | CF  | 6  | 1624 | 19° 34' 47'' | 96° 57' 38'' |
| 41 | SCHI | Mexico, Veracruz, Coacoatzintla      | SMOr | CF  | 11 | 1501 | 19° 37' 41'' | 96° 52' 56'' |
| 42 | SCHI | Mexico, Veracruz, Volcán de Acatlán  | SMOr | CF  | 8  | 1840 | 19° 40' 47'' | 96° 51' 11'' |
| 43 | SCHI | Mexico, Puebla, Lagunillas           | SMOr | CF  | 6  | 1500 | 20° 13' 23'' | 97° 57' 33'' |
| 44 | SCHI | Mexico, San Luis Potosí, Xilitla     | SMOr | TDF | 9  | 836  | 21° 21' 39'' | 98° 59' 35'' |
| 45 | SCHI | Mexico, Veracruz, Las Choapas        | SMOr | TDF | 1  | 18   | 17° 38' 41'' | 93° 58' 54'' |
| 46 | SCHI | Mexico, Chiapas, Jitotol             | CHIS | CF  | 4  | 1698 | 17° 02' 54'' | 92° 51' 18'' |
| 47 | SCHI | Mexico, Chiapas, Ocosingo            | CHIS | TDF | 6  | 876  | 16° 55' 06'' | 92° 06' 09'' |
| 48 | CALY | Mexico, Chiapas, Arriaga, La Aurora  | CHIS | TDF | 4  | 699  | 16° 28' 18'' | 93° 49' 55'' |
| 49 | CALY | Mexico, Chiapas, Motozintla          | CHIS | TDF | 6  | 1353 | 15° 21' 21'' | 92° 14' 54'' |
| 50 | CALY | Mexico, Chiapas, Ciudad Cuauhtemoc   | CHIS | TDF | 9  | 1834 | 15° 55' 04'' | 91° 58' 55'' |
| 51 | CALY | Mexico, Chiapas, Parque Ya' Ax-Na    | CHIS | TDF | 6  | 1595 | 16° 13' 24'' | 92° 07' 48'' |

---

Region and habitat abbreviations are as follows: CHIS = Chiapas; OAX = Oaxaca; SMOr = Sierra Madre Oriental; TMVB = Trans-Mexican Volcanic Belt; CF = cloud forests; XTF = xeric temperate forests; TDF = tropical dry forests.

**Table S2.** Genetic variability and summary statistics (mean  $\pm$  SD) of *Psittacanthus calyculatus / schiedeanus* complex populations grouped based on previous species assignments (A), habitat type (B), admixture level (C) or mountain geography (D). Data estimated for nine loci.

| Classification              | Sample size | Total number of alleles | Allelic richness | Mean rarefied allelic richness | Observed Heterozygosity ( $H_o$ ) | Expected Heterozygosity ( $H_e$ ) | Inbreeding Coefficient ( $F_{is}$ ) |
|-----------------------------|-------------|-------------------------|------------------|--------------------------------|-----------------------------------|-----------------------------------|-------------------------------------|
| <b>(A) Species</b>          |             |                         |                  |                                |                                   |                                   |                                     |
| CALY                        | 215         | 177                     | 17.38            | 17.15                          | 0.29                              | 0.81                              | 0.63 (0.61–0.66)                    |
| SCHI                        | 192         | 145                     | 14.6             | 13.74                          | 0.43                              | 0.76                              | 0.43 (0.39–0.46)                    |
| <b>(B) Habitat</b>          |             |                         |                  |                                |                                   |                                   |                                     |
| CF                          | 126         | 127                     | 11.15            | 13.29                          | 0.45                              | 0.73                              | 0.38 (0.34–0.42)                    |
| XTF                         | 223         | 169                     | 13.21            | 12.26                          | 0.28                              | 0.8                               | 0.64 (0.61–0.66)                    |
| TDF                         | 58          | 118                     | 11.47            | 11.11                          | 0.37                              | 0.83                              | 0.55 (0.48–0.62)                    |
| <b>(C) Admixture groups</b> |             |                         |                  |                                |                                   |                                   |                                     |
| CALY                        | 135         | 122                     | 11.61            | 6.2                            | 0.26                              | 0.7                               | 0.62 (0.57–0.66)                    |
| HYBR                        | 114         | 152                     | 15.18            | 8.09                           | 0.32                              | 0.83                              | 0.61 (0.56–0.66)                    |
| SCHI                        | 158         | 140                     | 13.48            | 6.72                           | 0.44                              | 0.75                              | 0.41 (0.37–0.45)                    |
| <b>(D) Geography</b>        |             |                         |                  |                                |                                   |                                   |                                     |
| CHIS                        | 35          | 90                      | 8.49             | 6.33                           | 0.33                              | 0.82                              | 0.59 (0.49–0.69)                    |
| OAX                         | 90          | 130                     | 10.26            | 6.35                           | 0.30                              | 0.78                              | 0.61 (0.57–0.66)                    |
| SMOr                        | 147         | 132                     | 9.89             | 5.64                           | 0.45                              | 0.74                              | 0.39 (0.35–0.43)                    |
| TMVB                        | 135         | 122                     | 8.68             | 5.39                           | 0.26                              | 0.70                              | 0.62 (0.57–0.66)                    |

$F_{is}$ = Parenthesis include the 95% CI estimated with 1000 bootstraps in the R package DiveRsity<sup>91</sup>.

**Table S3.** Results of the AMOVA models on *Psittacanthus schiedeanus/calyculatus* populations grouped by (A) species (*calyculatus*, *schiedeanus*), (B) habitat type (CF, XTF, TDF), (C) admixture level (CALY, HYBR, SCHI), and (D) mountain geography (CHI, OAX, SMO<sub>r</sub>, TMVB).

|                                 | d.f. | Sum of squares | Variance components | Percentage of variation | Fixation indices         |
|---------------------------------|------|----------------|---------------------|-------------------------|--------------------------|
| <b>(A) Species</b>              |      |                |                     |                         |                          |
| Among groups                    | 1    | 76.26          | 0.1614              | 5.83                    | $F_{ST} = 0.2605^{***}$  |
| Among populations within groups | 49   | 535.91         | 0.5599              | 20.23                   | $F_{SC} = 0.2148^{***}$  |
| Within populations              | 765  | 1565.91        | 2.0400              | 73.94                   | $F_{CT} = 0.0583^{***}$  |
| <b>(B) Habitat type</b>         |      |                |                     |                         |                          |
| Among groups                    | 2    | 102.97         | 0.1641              | 5.97                    | $F_{ST} = 0.25582^{***}$ |
| Among populations within groups | 48   | 509.21         | 0.5395              | 19.61                   | $F_{SC} = 0.20859^{***}$ |
| Within populations              | 765  | 1565.91        | 2.0495              | 74.42                   | $F_{CT} = 0.05968^{***}$ |
| <b>(C) Admixture</b>            |      |                |                     |                         |                          |
| Among groups                    | 2    | 115.07         | 0.1691              | 6.67                    | $F_{ST} = 0.2532^{***}$  |
| Among populations within groups | 48   | 497.11         | 0.5248              | 19.75                   | $F_{SC} = 0.20407^{***}$ |
| Within populations              | 765  | 1565.91        | 2.0469              | 74.68                   | $F_{CT} = 0.06173^{***}$ |
| <b>(D) Geography</b>            |      |                |                     |                         |                          |
| Among groups                    | 3    | 132.65         | 0.1746              | 6.38                    | $F_{ST} = 0.25170^{***}$ |
| Among populations within groups | 47   | 479.53         | 0.5139              | 18.79                   | $F_{SC} = 0.20069^{***}$ |
| Within populations              | 765  | 1565.91        | 2.0469              | 74.83                   | $F_{CT} = 0.06382^{***}$ |

**Table S4.** Posterior parameter estimates for the best-supported scenario (scenario 2, *isolation with admixture model* in which HYBR population was generated by admixture between CALY and SCHI populations at t1, then CALY merged with SCHI at t2) considering the three mistletoe groups (CALY, CHIS, HYBR). Estimates are based on 1% of simulated datasets closest to the observed values. Simulations and approximate Bayesian computation (ABC) analyses were performed considering microsatellites.

| Parameter                                 | Mean     | Median   | Mode     | q025     | q050     | q250     | q750     | q950     | q975     |
|-------------------------------------------|----------|----------|----------|----------|----------|----------|----------|----------|----------|
| CALY                                      | 9.15E+03 | 8.25E+03 | 7.46E+03 | 2.88E+03 | 3.49E+03 | 5.98E+03 | 1.12E+04 | 1.83E+04 | 2.16E+04 |
| HYBR                                      | 2.08E+04 | 2.13E+04 | 2.36E+04 | 9.44E+03 | 1.10E+04 | 1.67E+04 | 2.54E+04 | 2.90E+04 | 2.95E+04 |
| SCHI                                      | 1.37E+04 | 1.34E+04 | 1.31E+04 | 6.19E+03 | 7.27E+03 | 1.08E+04 | 1.63E+04 | 2.09E+04 | 2.30E+04 |
| t1                                        | 9.01E+03 | 8.28E+03 | 6.66E+03 | 2.77E+03 | 3.34E+03 | 5.83E+03 | 1.15E+04 | 1.73E+04 | 1.91E+04 |
| t2                                        | 1.75E+04 | 1.80E+04 | 2.30E+04 | 7.68E+03 | 8.94E+03 | 1.40E+04 | 2.15E+04 | 2.43E+04 | 2.47E+04 |
| ra                                        | 5.47E-01 | 5.64E-01 | 6.23E-01 | 5.44E-02 | 1.04E-01 | 3.69E-01 | 7.37E-01 | 9.31E-01 | 9.64E-01 |
| Mean mutation rate<br>( $A\mu_{mic\_1}$ ) | 5.04E-04 | 4.77E-04 | 3.94E-04 | 1.81E-04 | 2.13E-04 | 3.50E-04 | 6.42E-04 | 8.78E-04 | 9.33E-04 |
| Mean coeff. (pmic_1)                      | 2.37E-01 | 2.48E-01 | 3.00E-01 | 1.23E-01 | 1.36E-01 | 2.03E-01 | 2.80E-01 | 3.00E-01 | 3.00E-01 |
| Mean SNI rate (snimic_1)                  | 1.48E-06 | 5.92E-07 | 1.29E-08 | 1.53E-08 | 2.10E-08 | 1.27E-07 | 2.02E-06 | 6.04E-06 | 7.45E-06 |

Parameters are  $N$  = effective population size for CALY (pop1, N1), HYBR (Pop2, N2), SCHI (Pop3, N3),  $t$  = time since divergence, ra = admixture rate and  $\mu$  = mutation rate for nuclear microsatellites. Group abbreviations are as follows: CALY = *P. calyculatus* along the TMVB; HYBR = admixed region (Oaxaca and Chiapas); SCHI = *P. schiedeanus* along the Sierra Madre Oriental.

**Fig. S1** Admixture proportions obtained with STRUCTURE for (A) simulated hybrid individuals and (B) individuals from natural populations of the *Psittacanthus calyculatus* / *P. schiedeanus* complex.

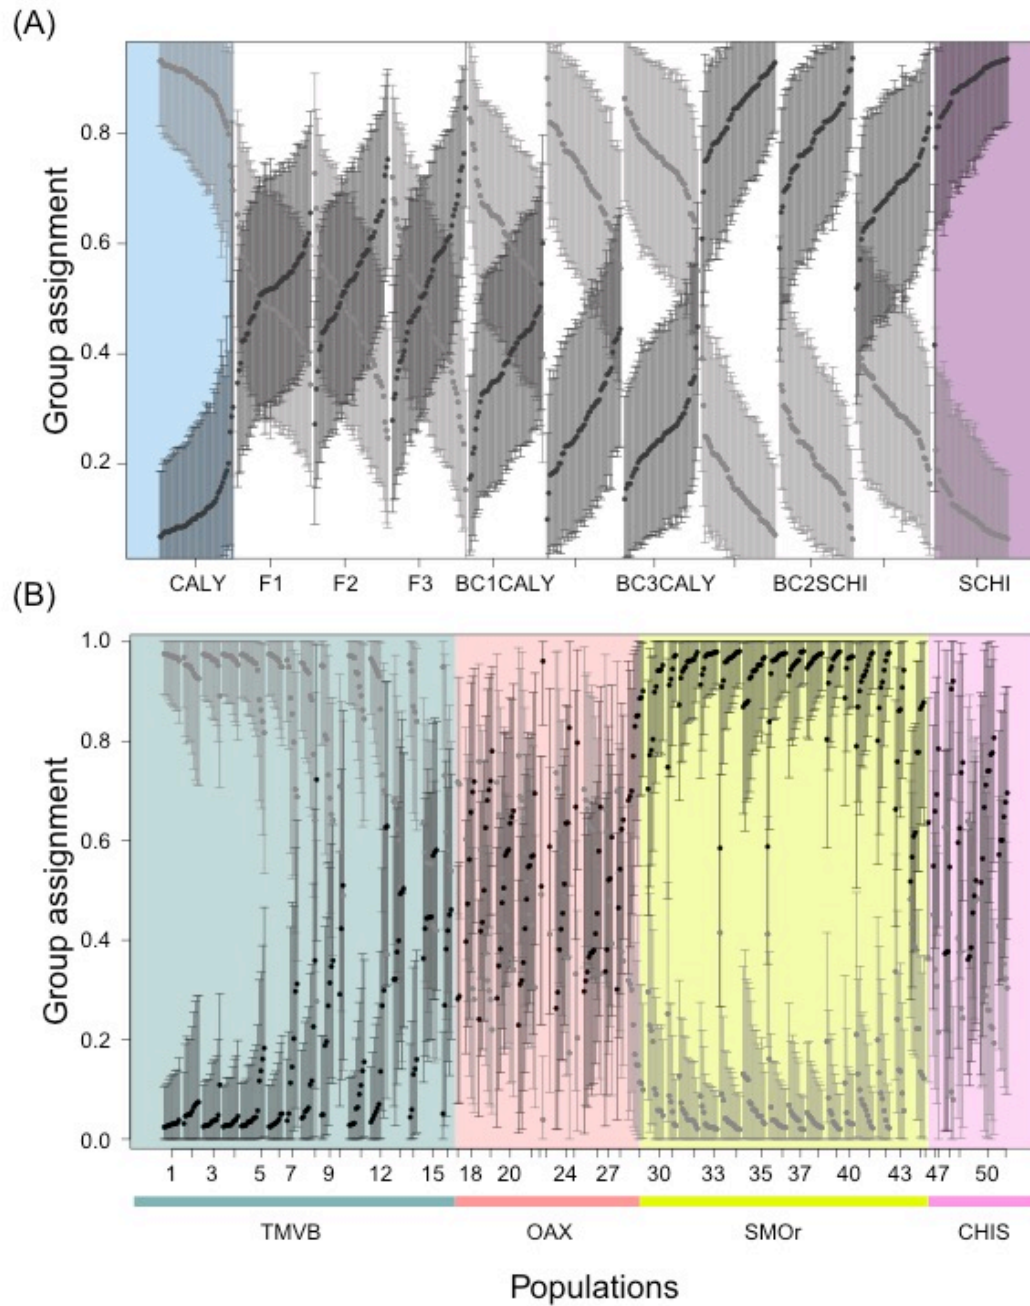

Supplement: 41598_2018_23707_MOESM1_ESM.pdf [file 41598_2018_23707_MOESM1_ESM.pdf]
